# Supplementary material
Source: PubMed Central journal article supplement (PMC2903661)

0211-6

Archive directory: /export/home/r/dy/j03/vnmr/sys/de  
Sample directory:  
File: PROTON  
Pulse Sequence: s2pu1  
Solvent: DMSO  
Ambient temperature  
Mercury-400B8 "mercury401"

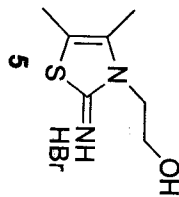

Relax. delay 1.000 sec  
Pulse 45.00 degrees  
Acq. time 1.998 sec  
Width 6339.8 Hz  
16 repetitions  
OBSERVE H1, 399.7492738 MHz  
DATA PROCESSING  
F1 size 32768  
Total time 0 min, 50 sec

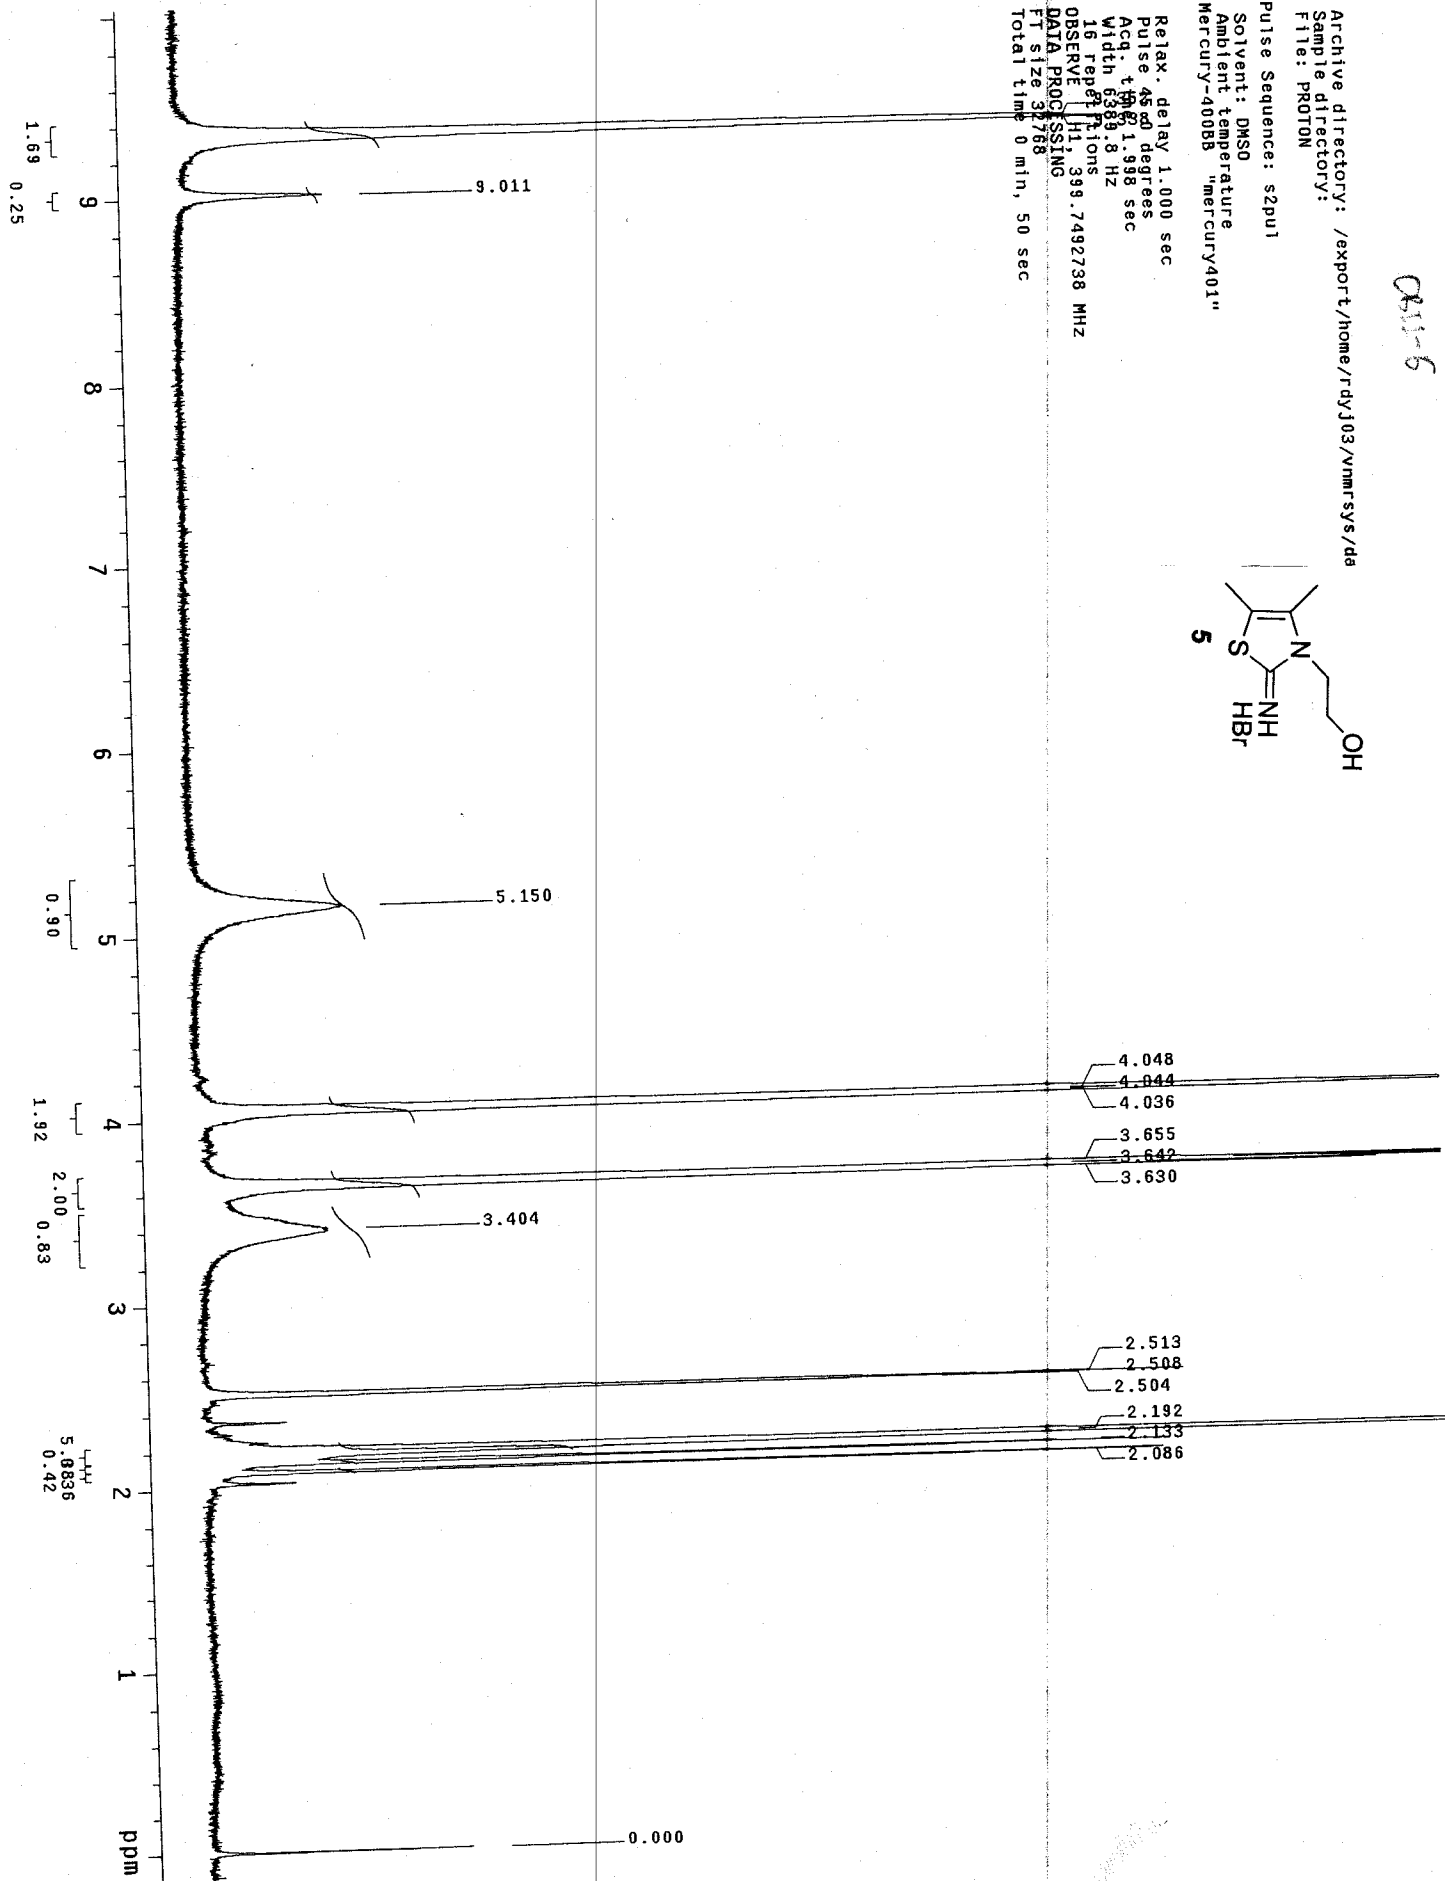

Archive directory: /export/home/rdyj03/vnmr/sy/data  
Sample directory:  
File: PROTON

Pulse Sequence: s2pu1  
Solvent: CDCl3  
Ambient temperature  
Mercury-400BB "mercury401"

Relax. delay 1.000 sec  
Pulse 45.0 degrees  
Acq. time 1.000 sec  
Width 6389.8 Hz  
16 Repetitions  
OBSERVE H1 399.7473820 MHz  
DATA PROCESSING  
FT size 32768  
Total time 0 min, 50 sec

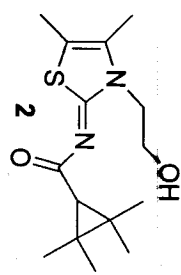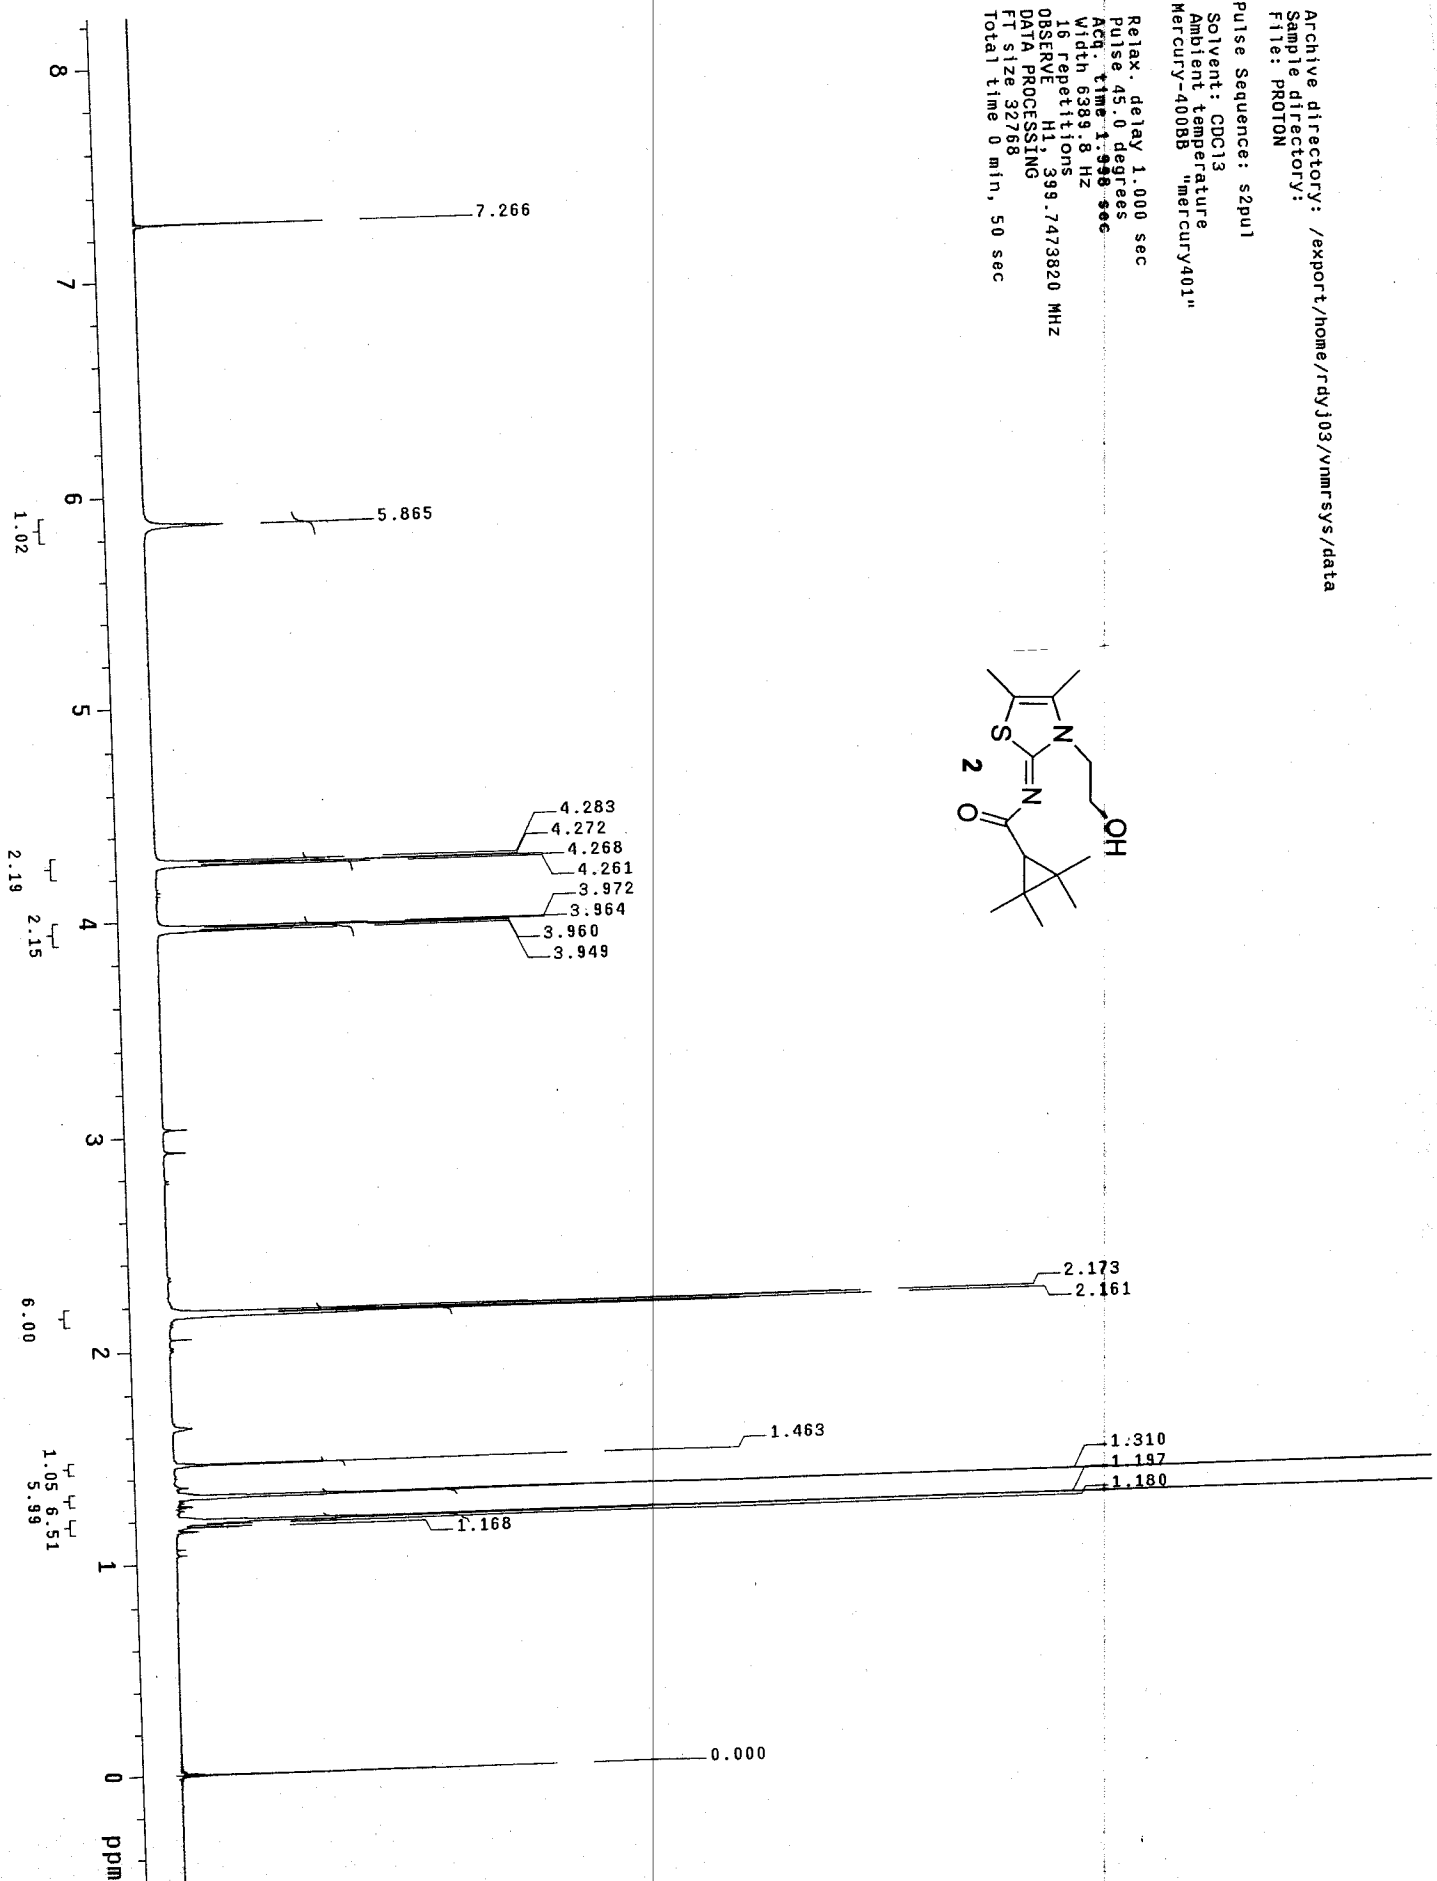

Supplement: NIHMS210324-supplement-02.pdf [file NIHMS210324-supplement-02.pdf]
